RESEARCH ARTICLE

# Coaxial Microincision Cataract Surgery versus Standard Coaxial Small-Incision Cataract Surgery: A Meta-Analysis of Randomized Controlled Trials

Xingchao Shentu, Xin Zhang, Xiajing Tang, Xiaoning Yu\*

Eye Center, Second Affiliated Hospital, School of Medicine, Zhejiang University, Hangzhou, China

\* [yxnzju@163.com](mailto:yxnzju@163.com)

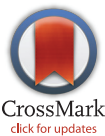

OPEN ACCESS

**Citation:** Shentu X, Zhang X, Tang X, Yu X (2016) Coaxial Microincision Cataract Surgery versus Standard Coaxial Small-Incision Cataract Surgery: A Meta-Analysis of Randomized Controlled Trials. PLoS ONE 11(1): e0146676. doi:10.1371/journal.pone.0146676

**Editor:** Haotian Lin, Sun Yat-sen University, CHINA

**Received:** September 3, 2015

**Accepted:** December 20, 2015

**Published:** January 8, 2016

**Copyright:** © 2016 Shentu et al. This is an open access article distributed under the terms of the [Creative Commons Attribution License](https://creativecommons.org/licenses/by/4.0/), which permits unrestricted use, distribution, and reproduction in any medium, provided the original author and source are credited.

**Data Availability Statement:** All relevant data are within the paper and its Supporting Information files.

**Funding:** This work was supported by Zhejiang KeyLaboratory Fund of China (Grant No. 2011E10006), the National Natural Science Foundation of China (Grant No. 81371000), the Natural Science Foundation of Zhejiang Province (Grant No. LY14H120002), and the Foundation from Health and Family Planning Commission of Zhejiang Province (Grant No. 201347434). The funders had no role in study design, data collection and analysis, decision to publish, or preparation of the manuscript.

## Abstract

### Background

We conducted this meta-analysis to compare the outcomes of coaxial microincision cataract surgery (C-MICS) and standard coaxial small incision cataract surgery (C-SICS).

### Methods

The outcomes of randomized controlled trials (RCTs) reporting C-MICS and C-SICS were collected from PubMed, Web of Science, and The Cochrane Library in May 2015. The final meta-analysis was conducted on the following intraoperative and postoperative outcomes: ultrasound time (UST), effective phacoemulsification time (EPT), balanced salt solution use (BSS use), cumulative dissipated energy (CDE), mean surgery time, endothelial cell loss percentage (ECL%), best corrected visual acuity (BCVA), increased central corneal thickness (CCT), laser flare photometry values and surgically induced astigmatism (SIA).

### Results

A total of 15 RCTs, involving 1136 eyes, were included in the final meta-analysis. No significant between-group differences were detected in EPT, BSS use, CDE, BCVA, laser flare photometry values or increased CCT. However, the C-MICS group showed less SIA (at postoperative day 7:  $p < 0.01$ ; at postoperative day 30 or more:  $p < 0.01$ ) and greater ECL% (at postoperative day 60 or more:  $p < 0.01$ ), whereas the C-SICS group required a shorter UST ( $p < 0.01$ ).

### Conclusions

The present meta-analysis suggested that the C-MICS technique was more advantageous than C-SICS in terms of SIA, but C-MICS required a longer UST and induced a higher ECL%. Further studies should be done to confirm our results.

**Competing Interests:** The authors have declared that no competing interests exist.

## Introduction

Due to recent improvements in phacoemulsification techniques, advances in surgical instruments, and the advent of the foldable intraocular lens (IOL), the C-MICS technique has gained global popularity among ophthalmologists. Prior to these advances, the C-SICS approach, which required a 2.8 to 3.2 mm incision, was the most widely used surgical approach; however, using the C-MICS technique can reduce the incision to less than 2.2 mm [1–2].

In C-MICS, microcoaxial phacoemulsification, irrigation, aspiration, and phacoemulsification are performed with the same instruments as those used in C-SICS [3]. As a result, C-MICS inherits nearly all the advantages of C-SICS, while making smaller incisions. C-MICS patients can then expect more rapid wound healing, smaller SIAs, better post-operative visual acuity, lower risk of infection, and more stable corneal biomechanics following their procedures [4–6]. However, as with other cataract operations, C-MICS may have some disadvantages. Skeptics argue that smaller incisions may be related to decreased followability of the nucleus, reduced efficacy, limited infusions (due to smaller instrument gauges), and increased wound trauma (caused by the relatively tight incisions) [5,7–9]. Numerous clinical trials have been designed and conducted to determine whether C-MICS has more advantages than C-SICS; however, a consensus has not yet been reached. We conducted this meta-analysis to quantitatively ascertain if a switch from C-SICS to C-MICS is necessary.

## Materials and Methods

This meta-analysis was performed in accordance with the Preferred Reporting Items for Systematic Reviews and Meta-Analyses (PRISMA) statement checklist [10].

## Search Strategy and Study Selection

Systemic literature searches were performed in three databases: PubMed, Web of Science and The Cochrane Library. The search covered studies published until May of 2015. The reference lists of relevant papers were then manually screened by the investigators for pertinent articles missed in the primary searches. Search items included: “coaxial”, “microcoaxial”, “microincision”, “microphacoemulsification”, “cataract surgery”, “effective phacoemulsification time”, “balanced salt solution use”, “cumulative dissipated energy”, “surgery time”, “endothelial cell loss percentage”, “best corrected visual acuity”, “ultrasound time”, “increased central corneal thickness”, “laser flare photometry values” and “surgically induced astigmatism” in various combinations.

Only articles that fulfill all of the following criteria were considered for inclusion in this meta-analysis: (1) original RCTs comparing the outcomes of C-MICS with the outcomes of C-SICS; (2) subjects with no ocular diseases other than cataracts; and (3) C-MICS incision sizes of less than 2.2 mm. The two investigators, Yu and Zhang, independently performed the initial search in terms of abstracts and titles. They then screened the full text of each potential study according to the inclusion criteria detailed above.

All of the selected RCTs were evaluated according to the Jadad scoring system developed by Crowther et al. [11], and studies scoring three or more points were deemed to be of high quality. No specific language restriction was imposed on the selection of publications.

## Data Extraction

The two investigators independently extracted the data using a standardized data extraction format which include the following intraoperative and postoperative outcomes: EPT, BSS use, CDE, surgery time, ECL%, BCVA, UST, CCT, laser flare photometry values and SIA. Any

disagreement was decided by the consensus of the investigators. For studies involving more than one microincision size, we used the smaller size.

## Data Synthesis and Statistical Analysis

All statistical analyses in this meta-analysis were conducted using Stata version 12.0 software. The significance level of the statistics was set to  $P < 0.01$ , except in the case of heterogeneity and meta-regression analyses. The means and standard deviations of continuous outcomes were used to calculate the weighted mean difference (WMD) with a 95% confidence interval (CI). Potential heterogeneities among the included studies were assessed using Cochran's Q statistic and an  $I^2$  index score, with the significance level set at a  $P$ -value less than 0.10 or an  $I^2$  score greater than 50% [12]. When high heterogeneity was detected among the included studies, the random effects model based on the DerSimonian and Laird method was used; otherwise, the fixed-effects model based on the inverse variance method was performed [13]. For studies reporting BCVA via the Snellen system, the method introduced by Chen et al. was used to transfer the data to the logMAR system [14]. The methods described by Chen et al. were utilized to calculate EPT, CDE and ECL% [14–16]. A sensitivity analysis was used to assess the robustness of the meta-analysis results by sequentially omitting individual studies. Egger's linear regression and Begg's rank correlation tests were used to evaluate the potential publication bias [17–18].

## Results

### Literature Search Results and Characteristics of Included RCTs

Of the 145 potentially relevant articles identified by the electronic databases and reference lists of included articles (Fig 1), 37 articles were retrieved for final review after the evaluation of titles and abstracts. Upon further screening, 22 articles were excluded for the following reasons: 7 articles did not involve RCTs [19–25], 7 articles did not provide specific data related to this meta-analysis [26–32], 5 articles were not available in full text [33–37], and 3 articles involved a microincision larger than 2.2 mm [38–40]. Ultimately, 15 studies meeting all predefined inclusion criteria were included in the present meta-analysis [5–7, 41–52].

A total of 1136 eyes were included in this meta-analysis. Of these, 568 were assigned to the C-MICS group, and 568 were assigned to the C-SICS group. The characteristics of the included RCTs were summarized in Table 1. According to the Jadad score, 15 of the included RCTs were considered to be of high quality.

### Intraoperative outcomes

**Ultrasound Time.** With regard to UST, nine articles yielded information on 689 eyes. According to the forest plot, the C-SICS group required a shorter UST than the C-MICS group in the random effects model (Fig 2, WMD: 8.679, 95% CI: 2.519 to 14.839,  $p = 0.006$ ,  $I^2 = 93.3%$ ,  $P_{\text{heterogeneity}} = 0.0000$ ).

**Mean Surgery Time.** Six RCTs, representing 508 eyes, reported mean surgery time. The pooled results showed no statistical differences between the C-MICS group and the C-SICS group in the random effects model (Fig 2, WMD: 0.541, 95% CI: -0.216 to 1.297,  $p = 0.161$ ,  $I^2 = 88.9%$ ,  $P_{\text{heterogeneity}} = 0.0000$ ).

**Balanced Saline Use.** Fig 3 showed that four RCTs, representing 288 eyes, were involved in the comparison of the C-MICS and C-SICS groups in the context of BSS use. In the random effects model ( $I^2 = 59.2%$ ,  $P_{\text{heterogeneity}} = 0.061$ ), no significant between-group differences were detected (WMD: 0.877, 95% CI: -6.521 to 8.274).

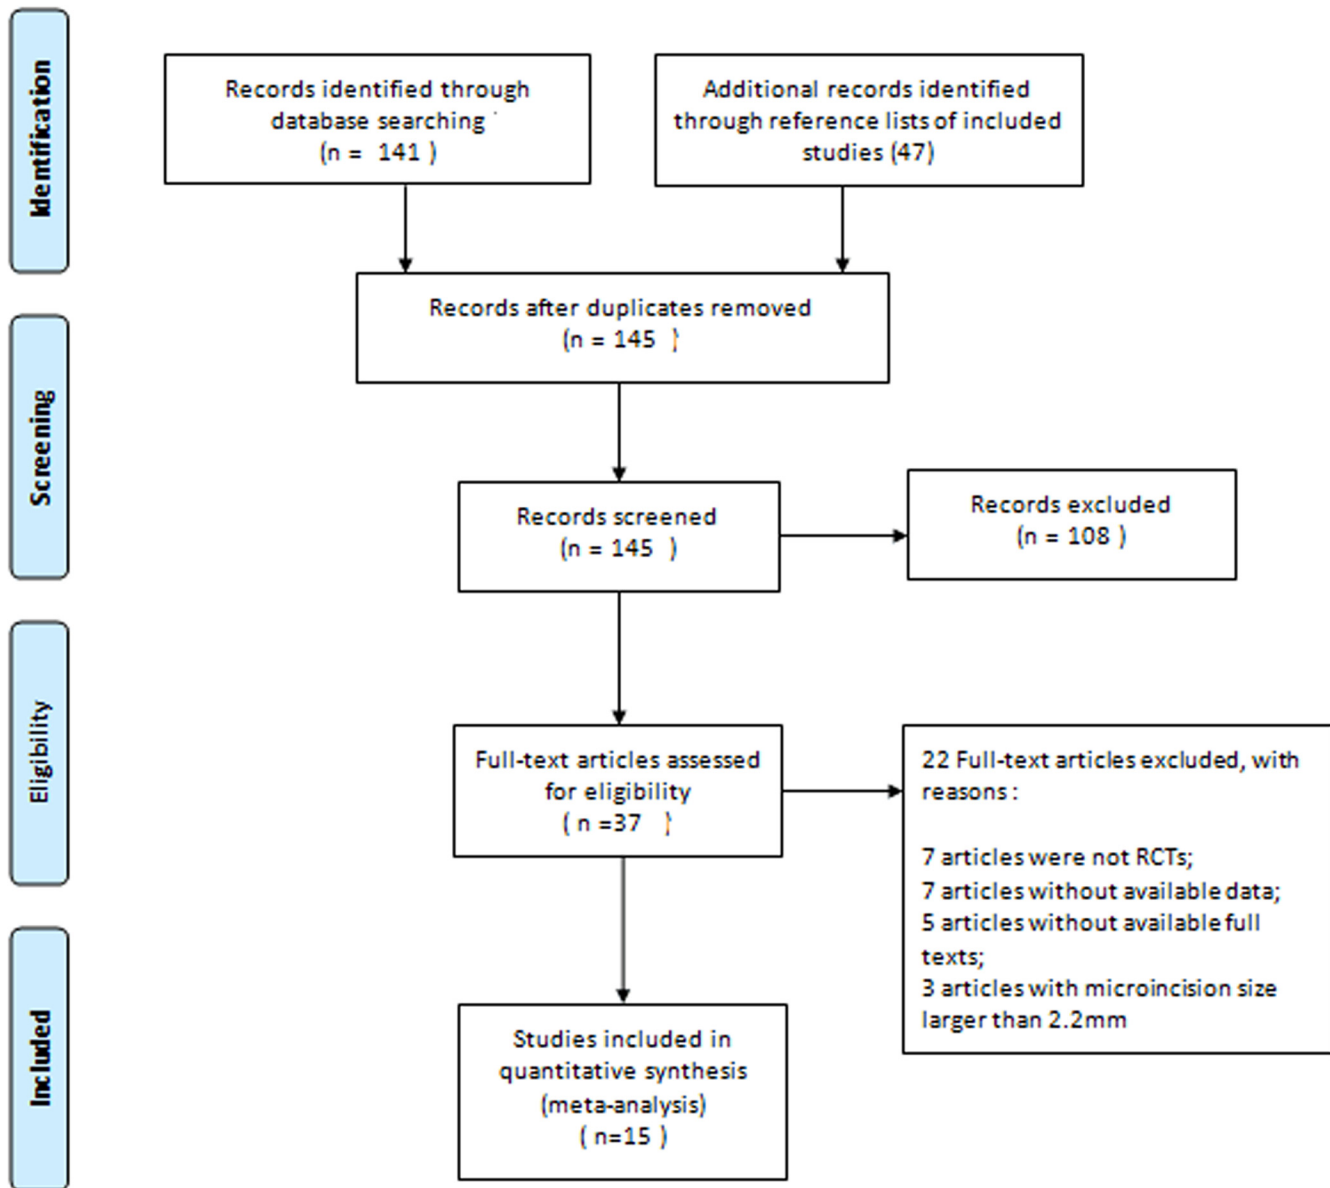

Fig 1. Flow diagram of study selection process.

doi:10.1371/journal.pone.0146676.g001

**Effective Phacoemulsification Time.** Five RCTs, representing 244 eyes, reported EPT data. Since significant heterogeneity was found among the included RCTs ( $I^2 = 98.5\%$ ,  $P_{\text{heterogeneity}} = 0.000$ ), the random effects model was adopted. Based on the forest plot in Fig 3, no significant difference was found between the C-MICS group and the C-SICS group (Fig 3; WMD: 3.691, 95% CI: -0.904 to 8.284).

**Cumulative Dissipated Ultrasound Energy.** Five studies compared the CDE of the C-MICS group and the C-SICS group, and they involved a total of 362 eyes. Considering the statistically significant heterogeneity ( $I^2 = 78.3\%$ ,  $P_{\text{heterogeneity}} = 0.001$ ), the random effects model was used to reduce errors in this meta-analysis. According to the forest plot in Fig 3, no significant differences were found between the two surgical procedures (WMD: -0.628, 95% CI: -2.317 to 1.061).

**Table 1. Characteristics of 15 randomized controlled trials Included into Present Meta-Analysis.**

| Source(Published Year, Country)  | Age (year)              | Gender | Sample size   | Incision size | Follow-up (day) | Jadad Score   |
|----------------------------------|-------------------------|--------|---------------|---------------|-----------------|---------------|
|                                  | C-MICS/SICS             | M/F    | C-MICS/C-SICS | C-MICS/C-SICS |                 |               |
| Can et al.(2010, Turkey)         | 65.8±13.2/66.2±12.6     | 36/28  | 45/45         | 2.2/2.8       | 90              | 1+0-1+0+0-0+1 |
| Hwang et al.(2015, Korea)        | 64.52±10.65/65.87±12.91 | NA     | 42/42         | 2.2/2.75      | 60              | 1+0-1+0+0-0+1 |
| Hayashi et al.(2014, Japan)      | 69.3±5.2/69.3±5.2       | 10/24  | 34/34         | 2/2.65        | 1               | 1+1-0+1+1-0+1 |
| Dosso et al. (2008, Switzerland) | 60-87/60-89             | NA     | 25/25         | 1.6/2.8       | 56              | 1+0-1+0+0-0+1 |
| Samuel et al. (2009, USA)        | NA                      | NA     | 22/22         | 2.2/3         | 42              | 1+0-1+0+0-0+1 |
| Musanovic et al. (2012Bosnia)    | 62.06±10.04/65.13±9.59  | NA     | 30/30         | 2.2/3         | 30              | 1+0-1+0+0-0+1 |
| Yao et al.(2011, China)          | 72±7/73±7               | 29/51  | 45/44         | 1.8/3         | 90              | 1+1-0+1+1-0+1 |
| Luo et al.(2012, China)          | 73.95±6.05/ 72.48±7.19  | 40/40  | 40/40         | 1.8/3.0       | 90              | 1+1-0+1+0-0+1 |
| Kim et al.(2011, Korea)          | 75.95±9.59/72.56±9.05   | NA     | 20/20         | 1.8/2.75      | 60              | 1+0-1+0+0-0+1 |
| Li et al. (2010, Korea)          | 66.83±9.51/69.25±8.45   | 39/32  | 37/39         | 2.2/2.8       | 30              | 1+0-1+0+0-0+1 |
| Wang et al.(2009, China)         | 69±9/71±8               | 28/58  | 43/44         | 2.2/3         | 90              | 1+0-1+0+0-0+1 |
| Hayashi et al.(2009, Japan)      | 70.1±6.9                | 21/39  | 60/60         | 2/2.65        | 56              | 1+1-0+1+0-0+1 |
| Hayashi et al.(2010, Japan)      | 69.5±6.5/67.8±6.2       | 16/68  | 43/41         | 2/3           | 56              | 1+1-0+1+0-0+1 |
| Hashemi et al. (2010, Iran)      | 66.5±12.0/67.1±11.1     | 34/40  | 37/37         | 2.2/2.8       | 90              | 1+0-0+1+0-0+1 |
| Zhu et al.(2014, China)          | 39-80/48-83             | 48/42  | 45/45         | 2.2/3         | 90              | 1+0-0+0+0-0+1 |

doi:10.1371/journal.pone.0146676.t001

## Postoperative Outcomes

**Postoperative Best Corrected Visual Acuity.** Seven articles described postoperative BCVA. We separately conducted subgroup meta-analyses on BCVA at three points in time: within 7 postoperative days, at postoperative day 30 and at postoperatively day 60. Five articles (356 eyes), reported the outcomes of the BCVA within 7 postoperative days, three articles (238 eyes) reported outcomes at day 30, and five articles (378 eyes) reported outcomes at 60 days.

The pooled results indicated no significant differences between the C-MICS group and the C-SICS group on postoperative BCVA (Fig 4; within 7 days: WMD: -0.001, 95% CI: -0.004 to 0.003,  $I^2 = 28.2\%$ ,  $P_{\text{heterogeneity}} = 0.234$ ; at day 30: WMD: -0.007, 95% CI: -0.033 to 0.020,  $I^2 = 73.2\%$ ,  $P_{\text{heterogeneity}} = 0.024$ ; at day 60: WMD: -0.005, 95% CI: -0.027 to 0.017;  $I^2 = 57.4\%$ ,  $P_{\text{heterogeneity}} = 0.052$ ).

**Laser Flare Photometry Values.** Three studies that were conducted by the same research team reported data for this outcome, and a total of 272 eyes were recruited. No significant differences were found in laser flare photometry values following C-MICS and C-SICS in the fixed effects model (WMD: 0.091, 95% CI: -0.804 to 0.986;  $I^2 = 25.6\%$ ,  $P_{\text{heterogeneity}} = 0.261$ ).

**Surgically Induced Astigmatism.** We included only SIA data evaluated by vector analysis in this meta-analysis. Three RCTs, representing 230 eyes, compared SIA following C-MICS and C-SICS at 7 postoperative days; and four RCTs, representing 254 eyes, compared SIA at 30 or more postoperative days. The random effects model was applied to reduce errors. The C-MICS group showed less SIAs than the C-SICS group (Fig 5; at day 7: WMD: -0.438, 95% CI: -0.714 to -0.161; at day 30 or more: WMD: -0.343, 95% CI: -0.475 to -0.211).

**Endothelial Cell Loss Percentage.** Six RCTs, involving 354 eyes, reported information concerning ECL% at 7 and 30 postoperative days, while eight RCTs involving 364 eyes reporting the same information at 60 or more postoperative days.

A meta-analysis of the three sets of data indicated no significant between-group differences in ECL% at 1 and 30 postoperative days following C-MICS and C-SICS (at day 7: WMD: 0.-188, 95% CI: -1.400 to 1.023,  $I^2 = 36.5\%$ ,  $P_{\text{heterogeneity}} = 0.163$ ; at day 30: WMD: 0.124, 95% CI: -2.589 to 2.837,  $I^2 = 65.3\%$ ,  $P_{\text{heterogeneity}} = 0.013$ ); while significant differences at 60 or more

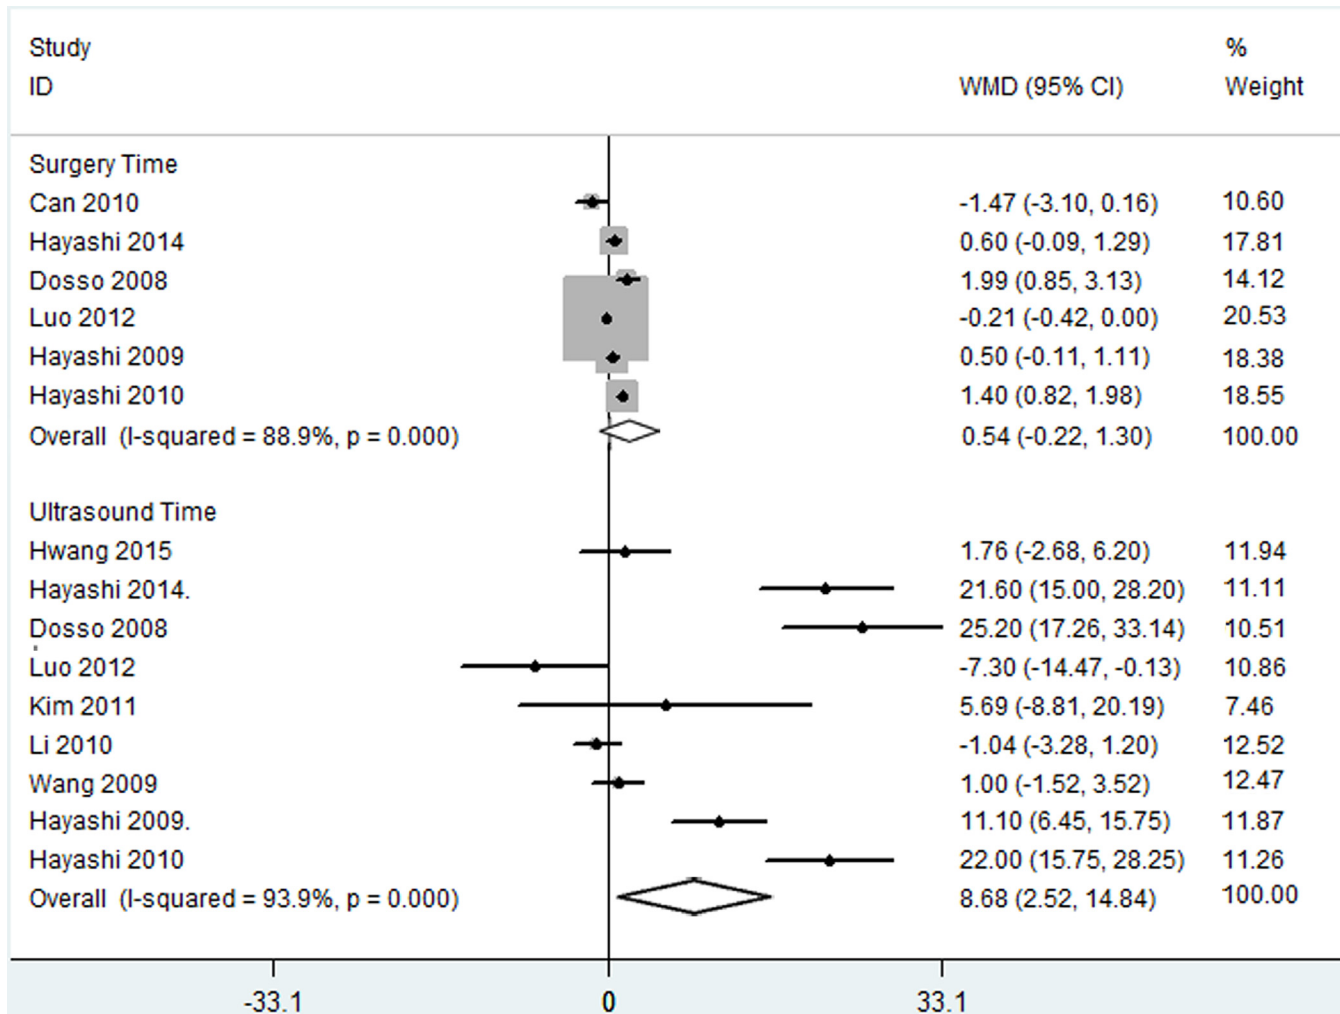

**Fig 2. Ultrasound time and surgery time between coaxial microincision cataract surgery and standard coaxial small-incision cataract surgery.**

doi:10.1371/journal.pone.0146676.g002

postoperative days (Fig 6; WMD: 1.090, 95% CI: 0.322 to 1.857;  $I^2 = 0.0\%$ ,  $P_{\text{heterogeneity}} = 0.700$ ).

**Increased Central Corneal Thickness.** Four RCTs reported data suggesting increased CCT, and a separate meta-analysis was conducted according to test dates. In the forest plot in Fig 6, there was no significant difference in increased CCT following C-MICS and C-SICS at 1,7,30 and 60 or more postoperative days (Fig 7; at day 1: WMD: -6.261, 95% CI: -33.810 to 21.290,  $I^2 = 92\%$ ,  $P_{\text{heterogeneity}} = 0.000$ ; at day 7: WMD: -3.200, 95% CI: -12.956 to 6.557,  $I^2 = 75.4\%$ ,  $P_{\text{heterogeneity}} = 0.007$ ; at day 30: WMD: -7.036, 95% CI: -15.864 to 1.792,  $I^2 = 77.7\%$ ,  $P_{\text{heterogeneity}} = 0.011$ ; at day 60 or more: WMD: -0.009, 95% CI: -5.404 to 5.387;  $I^2 = 0.0\%$ ,  $P_{\text{heterogeneity}} = 0.477$ ).

### Sensitivity Analysis and Publication Bias

The pooled results, following the sequential omission of individual studies, all fell in the range of the confidence interval with all RCTs included, indicating robust main meta-analysis results.

No publication biases were detected, except an increase in CCT at postoperative day 7 (Begg test:  $Z = 1.02$ ,  $p = 0.308$ ; Egger test:  $p = 0.048$ ).

### Meta-regression Analyses

We conducted meta-regression analyses to assess the possible effect of different variables in explaining heterogeneity: sample size, study conducted race, publication year and location. The results showed that sample size was the main heterogeneity source of CDE and BCVA at post-operative day 30 ( $P < 0.05$ ).

### Discussion

In terms of intraoperative parameters, this systematic meta-analysis involving 15 RCTs revealed no significant differences between the C-MICS group and the C-SICS group with respect to BSS use, CDE, EPT, or mean surgery time; however, the C-MICS group was associated with longer UST. Moreover, in terms of postoperative outcomes, no statistically significant between-group differences were detected in BCVA, CCT increases, or laser flare photometry values. The C-MICS group indicated a higher ECL% and less SIA than the C-SICS group.

With regard to intraoperative parameters, as mentioned above, the only significant difference between the two surgical procedures is the UST. A longer UST requires longer perfusion

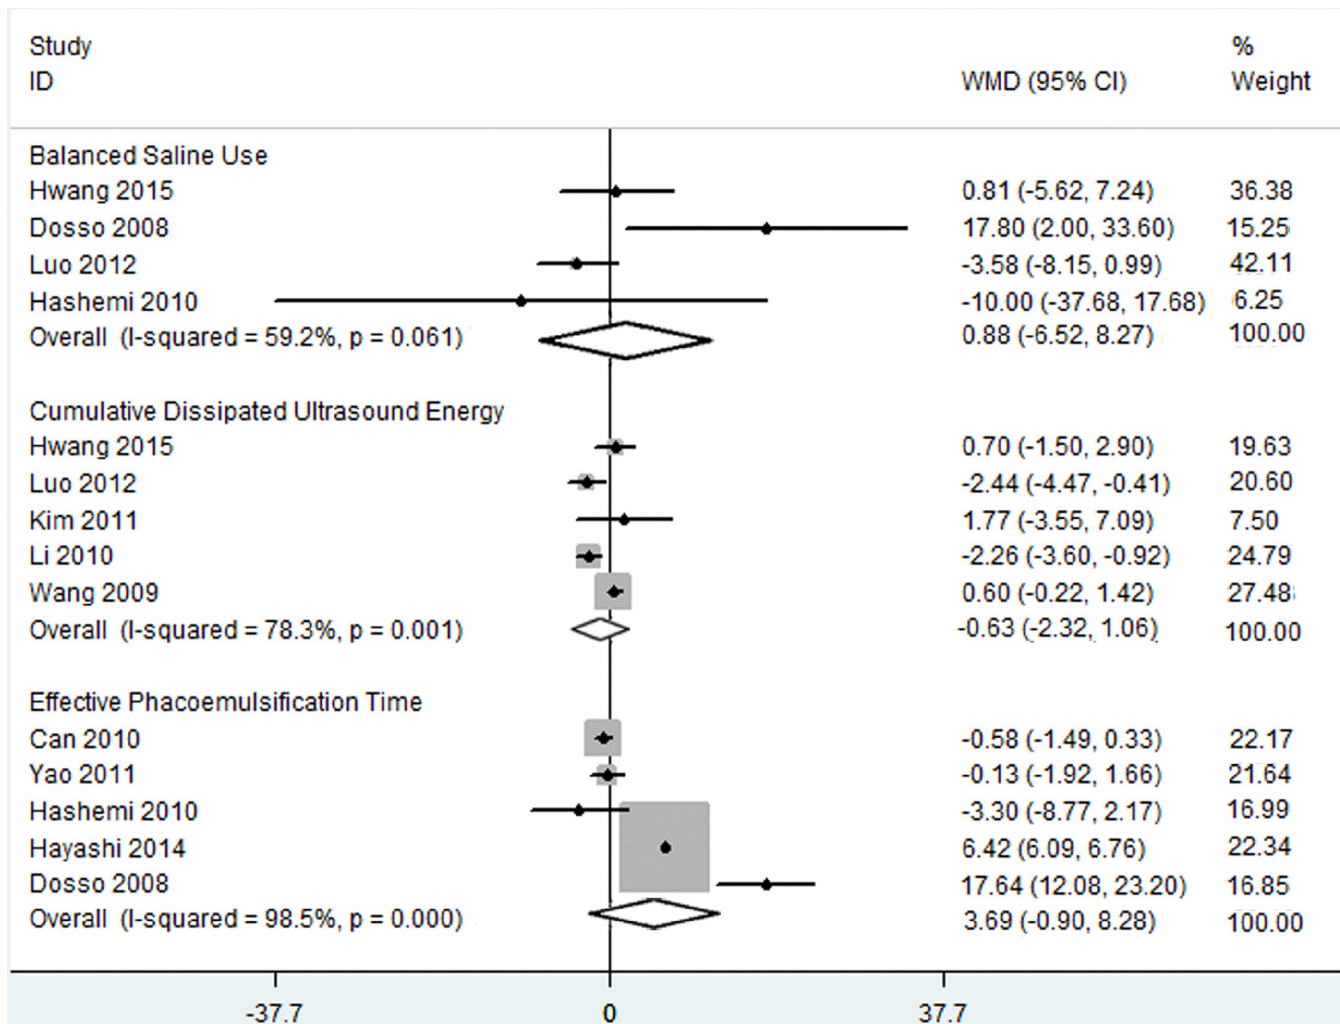

**Fig 3. Balanced saline use, cumulative dissipated ultrasound energy, and effective phacoemulsification time between coaxial microincision cataract surgery and standard coaxial small-incision cataract surgery.**

doi:10.1371/journal.pone.0146676.g003

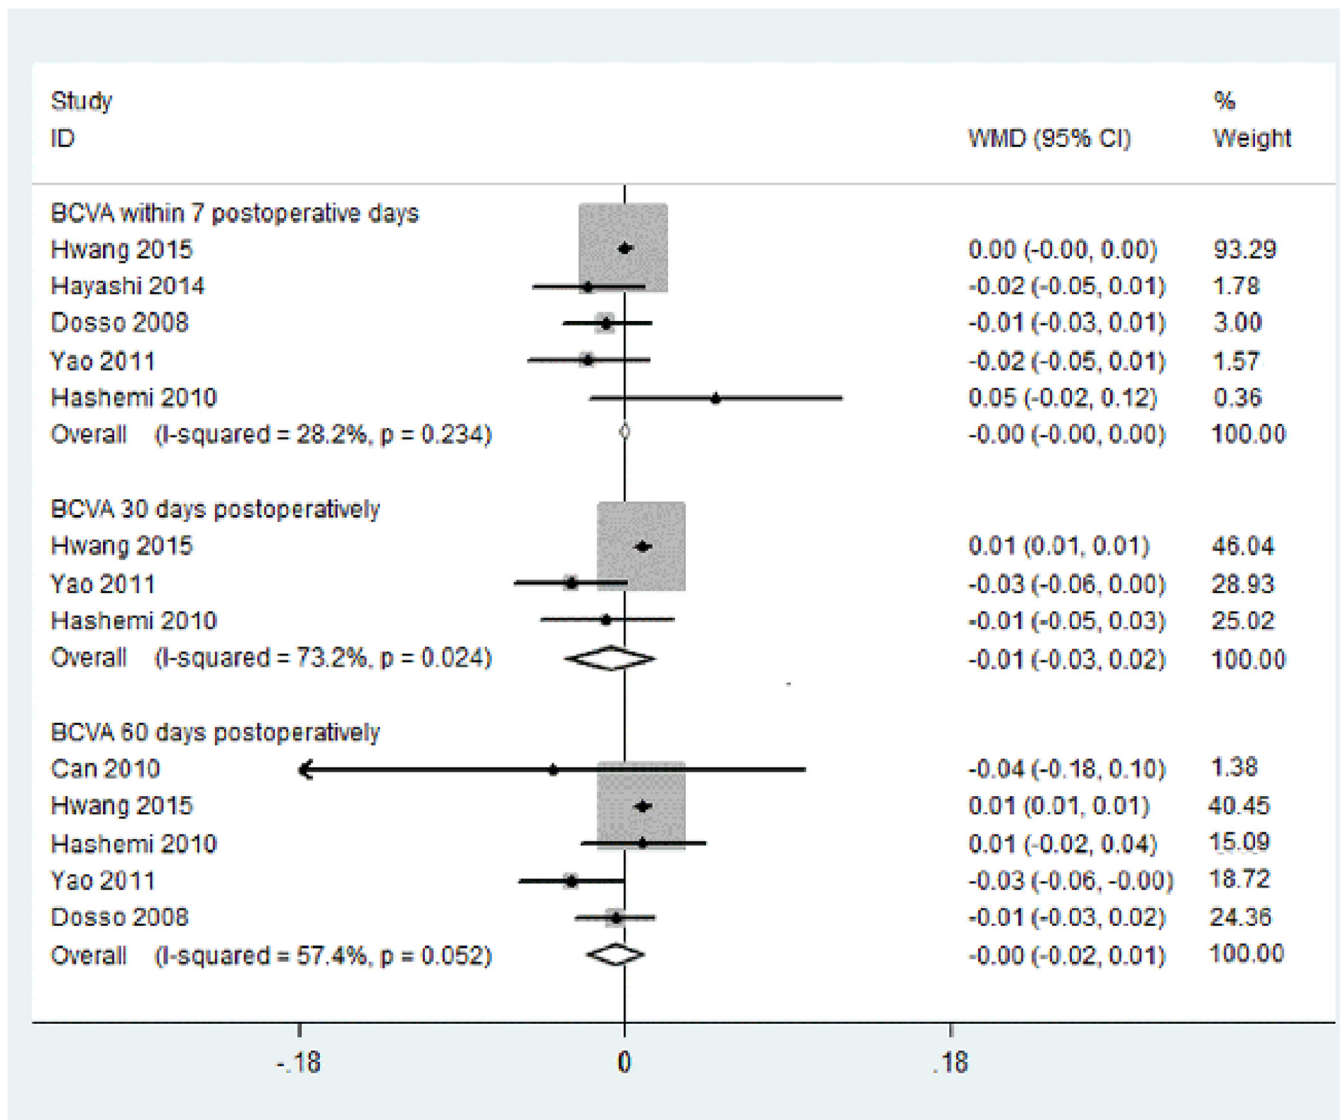

**Fig 4. Best corrected visual acuity between coaxial microincision cataract surgery and standard coaxial small-incision cataract surgery.**

doi:10.1371/journal.pone.0146676.g004

time under high perfusion pressure but does not imply an increased release of energy in the anterior chamber, given that different machines have different acoustic powers. Moreover, compared to the UST, the EPT and the CDE may serve as better measures of efficiency during surgery, according to the calculation formula. Some researchers have argued that smaller incisions might contribute to lower efficiency, particularly in high-density cataracts [53]. However, in this meta-analysis, the two techniques reported equal efficiency.

The BCVA is considered the most important parameter for evaluating the quality of cataract surgery [16]. Although no differences were detected in the BCVA of the two surgical procedures in our meta-analysis, the C-SICS reported a shorter mean recovery time [5].

Incision size was the main predictor of SIA. Smaller incisions not only induced less SIA, but also led to earlier refraction stabilization and corrected pre-surgical corneal astigmatisms [54–57]. Quantitatively, a corneal astigmatism of 0.5D is considered to be in the upper limit for successful functional visual acuity following IOL implantation [43], given that a 0.5-mm increase



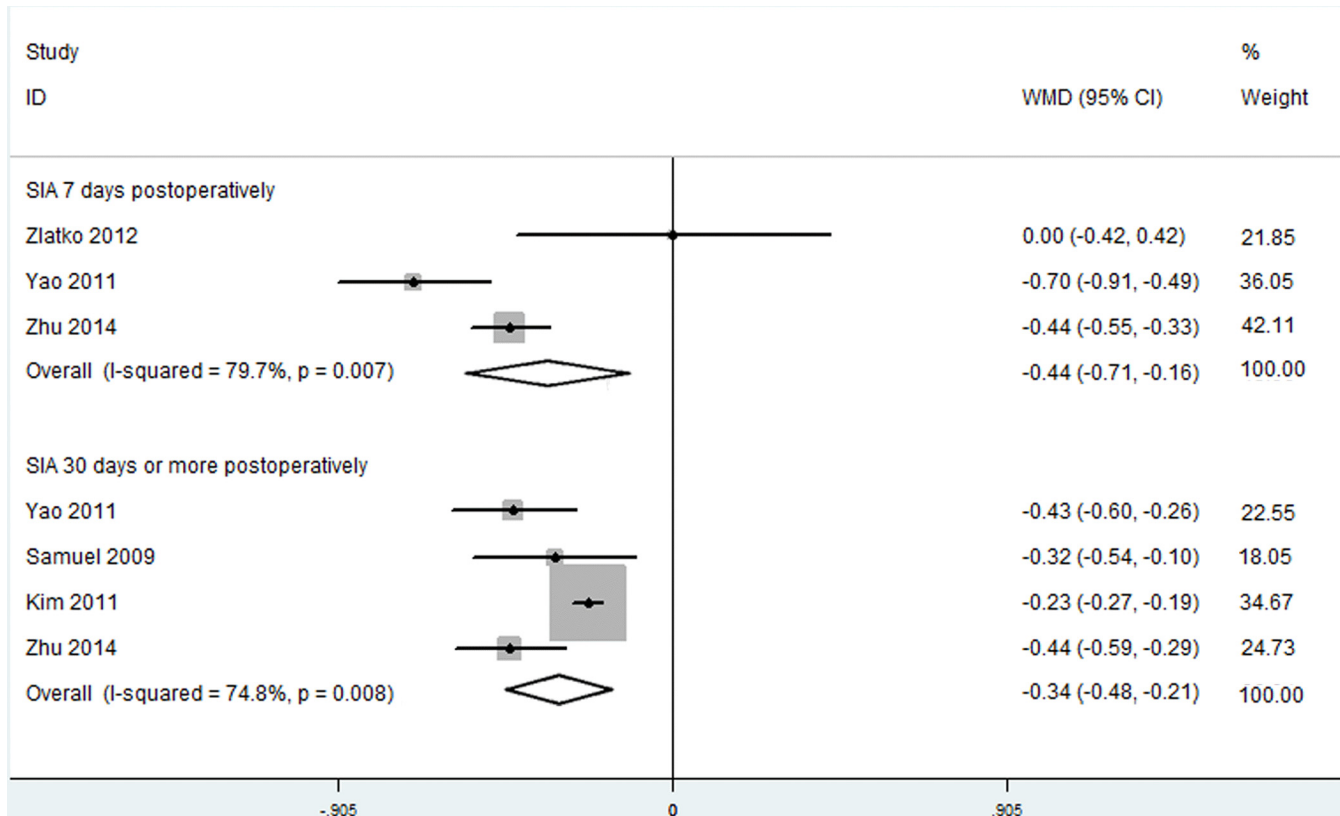

**Fig 5. Surgically induced astigmatism between coaxial microincision cataract surgery and standard coaxial small-incision cataract surgery.**

doi:10.1371/journal.pone.0146676.g005

in incision size leads to a 0.25D decrease in corneal curvature [58]. Hence, achieving less SIA is an important clinical target for cataract surgery. Our results indicate that the C-MICS technique offers an obvious advantage over the C-SICS technique with respect to SIA.

The postoperative ECL percentage must be a safety consideration in cataract surgery. Moreover, the complete endothelial cell loss process induced by phacoemulsification may last for 10 or more years or after surgery [59]. According to previous studies, the degree of endothelial damage may depend on the surgical technique, type of implanted IOL, emulsification time, age of the patient, cataract density, chattering of the nuclear pieces, corneal manipulation, and amount and type of fluid circulating in the anterior chamber [16, 60–65]. In our study, there were no between-group differences in ECL percentages at postoperative days 7 and 30. However, at postoperative day 60 or later, the C-MICS group exhibited more damage to the endothelial cells, and the discrepancy can be explained by Luo et al. who suggested that C-MICS caused more damage to the integrity of clear corneal incision (such as descemet’s membrane detachment, misaligned incisions, and wound gaps) than C-SICS [6,49]. Compared to C-SICS, the C-MICS’s smaller incision resulted in smaller attracting forces, which tended to increase turbulence [5]. In addition, inflammatory cytokines, such as IL-1b, IL-6, VEGF and PGE2, had higher postoperative expression ratios in the C-MICS group than in the C-SICS group, which indicates that the latter had more severe blood-aqueous barrier breakdowns [41]. Osher et al. reported that smaller incision sizes were related to greater incision temperatures; therefore, the thermal damage that occurs during C-MICS results in more damage to the ECD. Furthermore, according to our results as indicated above, the C-MICS group showed longer UST when compared to the C-SICS group, which means that the former is related to longer perfusion time in

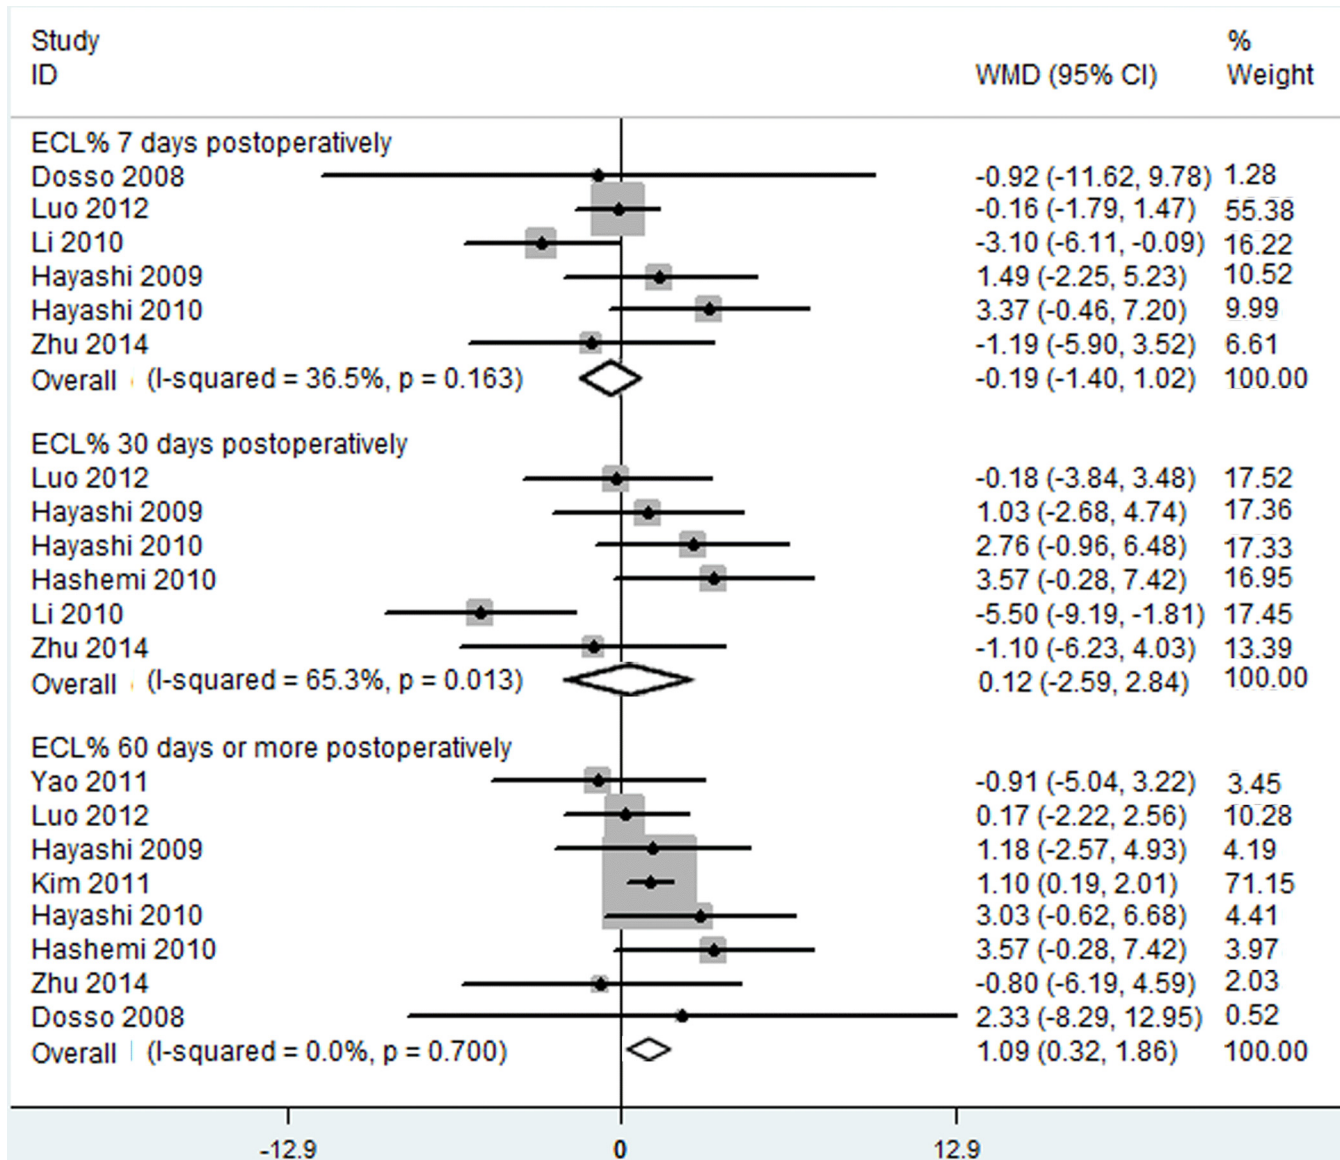

Fig 6. Endothelial cell loss percentage between coaxial microincision cataract surgery and standard coaxial small-incision.

doi:10.1371/journal.pone.0146676.g006

the case of high intraocular pressure [66]. Therefore, it is assumed that the C-MICS group brings the possibility of inducing the subsequent corneal endothelial cell loss [67]. Considering this, C-MICS is more than C-MICS and therefore a consideration in cataract surgery safety.

No significant differences were detected between the two procedures regarding increases in CCT or laser flare photometry values, which were considered important markers of surgery trauma. Although Hwang et al. reported that inflammatory cytokines in the C-MICS group had higher postoperative expression ratios than in the C-SICS group [41], sub-clinical changes may not build up to measurable levels. What's more, given the low number of studies included in our study, the results must therefore be interpreted with caution.

The limitations of our meta-analysis should be addressed. First, obvious heterogeneity was detected due to the diversity of the involved patients (e.g., different ages and genders), the surgery programs (e.g., different surgical skills and equipment), and research designs (e.g.,

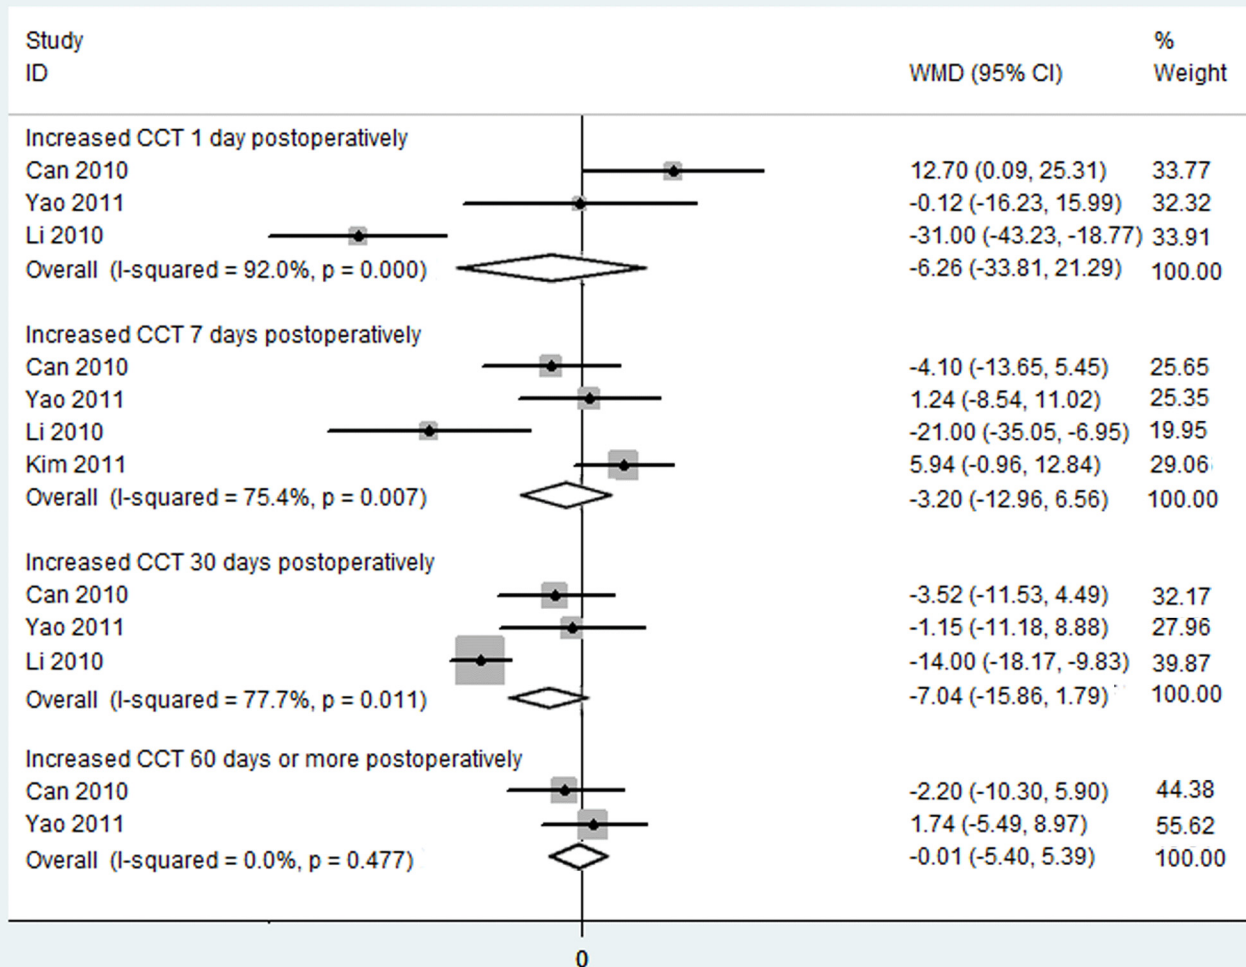

**Fig 7. Increased central corneal thickness between coaxial microincision cataract surgery and standard coaxial small-incision cataract surgery.**

doi:10.1371/journal.pone.0146676.g007

different follow-up periods and sample sizes), all of which affected the uniformity of the involved RCTs. Second, we cannot be sure if there were any significant differences in terms of LOCS levels. Specifically, according to Lee et al [53], varying-density cataracts would lead to varying preferences regarding surgical procedures. Third, a publication bias must be taken into consideration, since studies without statistically significant results would not be published. Fourth, for studies involving more than one microincision size, we chose the smaller-sized microincision, and that, may exaggerate the outcome differences of outcomes between the two groups. Fifth, only one included article reported data about postoperative complications, and the results implied no significant differences between the two groups; thus, we didn't evaluate the safety of the two types of surgical procedures. Lastly, the studies included in our meta-analysis were too few to improve the accuracy of Egger's linear regression test or Begg's rank correlation test in terms of publication bias.

In conclusion, the present meta-analysis showed that the two procedures were not only similar in terms of intraoperative parameters, but also similar in terms of postoperative BCVA, CCT increases, and anterior chamber inflammation levels. Switching from C-SICS to C-MICS is reasonable with regard to seeking less SIA. However, C-MICS was related to a higher ECL

percentage, suggesting that surgeons should be cautious when treating patients with corneal endothelial decomposition. Nevertheless, it is notable that no new surgical technique is perfect at the beginning of its development. We believe that, with the development of cryo-phaco techniques, liquid fluid systems and perfusion systems (which should focus on reducing perfusion pressure and perfusion time, increasing phaco efficiency and reducing endothelial cell loss), the future trend will be toward C-SICS. Further studies should be performed to confirm our results and to explore and compare other outcomes of C-MICS versus C-SICS, such as intraoperative and postoperative complications.

## Supporting Information

**S1 PRISMA Checklist. PRISMA 2009 checklist in this meta-analysis.**

(DOC)

**S1 File. The Jadad Score for Assessing the Quality of Studies Included into Present Meta-Analyses.**

(DOCX)

## Author Contributions

Conceived and designed the experiments: XS XY. Performed the experiments: XS XY XZ XT. Analyzed the data: XS XY XT. Contributed reagents/materials/analysis tools: XZ XY. Wrote the paper: XS XY XZ.

## References

1. Omulecki W, Wilczynski M. Minimizing the incision in cataract surgery—a continuous challenge. *Okulistyka*. 2004; 3:38–43
2. Alio JL, Rodriguez-Prats J-L, Vianello A, Galal A. Visual outcome of microincision cataract surgery with implantation of an Acri.Smart lens. *J Cataract Refract Surg*. 2005; 31:1549–1556. PMID: [16129290](#)
3. Osher RH, Injev VP. Microcoaxial phacoemulsification. Part 1: laboratory studies. *J Cataract Refract Surg*. 2007; 33:401–407 PMID: [17321389](#)
4. Wilczynski Michal, Supady Ewa, Piotr Loba, Synder Aleksandra, Palenga-Pydyn Dorota, Omulecki W. Comparison of surgically induced astigmatism after coaxial phacoemulsification through 1.8 mm microincision and bimanual phacoemulsification through 1.7 mm microincision. *J Cataract Refract Surg*. 2009; 35:1563–1569 doi: [10.1016/j.jcrs.2009.04.037](#) PMID: [19683153](#)
5. Can Izzet, Takmaz Tamer, Yildiz Yelda, Bayhan Hasan Ali, Soyugelen Gu'lizar, Bostanci B. Coaxial, microcoaxial, and biaxial microincision cataract surgery Prospective comparative study. *J Cataract Refract Surg*. 2010; 36:740–746 doi: [10.1016/j.jcrs.2009.11.013](#) PMID: [20457364](#)
6. Luo Lixia, Lin Haotian, He Mingguang, Kondon Natian, Yang Ye, Liu Yizhi. Clinical Evaluation of Three Incision Size-Dependent Phacoemulsification Systems. *Am J Ophthalmol*. 2012; 153:831–839 doi: [10.1016/j.ajo.2011.10.034](#) PMID: [22310081](#)
7. Dosso AA, Cottet L, Burgener ND, Di Nardo S. Outcomes of coaxial microincision cataract surgery versus conventional coaxial cataract surgery. *J Cataract Refract Surg*. 2008; 34:284–288. doi: [10.1016/j.jcrs.2007.09.037](#) PMID: [18242455](#)
8. Crema AS, Walsh A, Yamane Y, Nose W. Comparative study of coaxial phacoemulsification and microincision cataract surgery. *J Cataract Refract Surg*. 2007; 33:1014–1018 PMID: [17531696](#)
9. Dosso Andre Alexandre, Cottet Laura, Burgener Nathalie Dang, Di Nardo Silvio. Outcomes of coaxial microincision cataract surgery versus conventional coaxial cataract surgery. *J Cataract Refract Surg*. 2008; 34:284–288
10. Moher D, Liberati A, Tetzlaff J, Altman DG (2009) Preferred reporting items for systematic reviews and meta-analyses: the PRISMA statement. *PLOS Med* 6: e1000097. doi: [10.1371/journal.pmed.1000097](#) PMID: [19621072](#)
11. Crowther M, Lim W, Crowther MA. Systematic review and meta-analysis methodology. *Blood*. 2010; 116:3140–6 doi: [10.1182/blood-2010-05-280883](#) PMID: [20656933](#)

12. Higgins JP, Thompson SG, Deeks JJ, Altman DG. Measuring inconsistency in meta-analyses. *BMJ*. 2003; 327: 557–560. PMID: [12958120](#)
13. Der Simonian R, Kacker R. Random-effects model for meta analysis of clinical trials: an update. *Contemp Clin Trials*. 2007; 28:105–114 PMID: [16807131](#)
14. Chen Chong, Zhu Minjiao, Sun Yong, Qu Xinhua, Xu Xun. Bimanual microincision versus standard coaxial small-incision cataract surgery: meta-analysis of randomized controlled trials. *Eur J Ophthalmol*. 2015; 25: 119–127 doi: [10.5301/ejo.5000521](#) PMID: [25363858](#)
15. Liu YZ, Zeng MB, Liu XL, et al. Torsional mode versus conventional ultrasound mode phacoemulsification: Randomized comparative clinical study. *J Cataract Refract Surg*. 2007; 33:287–292. PMID: [17276271](#)
16. Crema AS, Walsh A, Yamane Y, Nosé W. Comparatie study of coaxial phacoemulsifiatin and microincision cataract surgery: one-year follow-up. *J Cataract Refract Surg*. 2007; 33:1014–1018 PMID: [17531696](#)
17. Egger M, Davey Smith G, Schneider M, Minder C. Bias in meta-analysis detected by a simple, graphical test. *BMJ*. 1997; 315: 629–634. PMID: [9310563](#)
18. Begg CB, Mazumdar M. Operating characteristics of a rank correlation test for publication bias. *Biometrics*. 1994; 50: 1088–1101. PMID: [7786990](#)
19. Orczykowska1 Maria, Owidzka Marta, Synder Aleksandra, Wilczyński Michał, Omulecki Wojciech. Comparative analysis of early distance visual acuity in patients after coaxial phacoemulsification through the micro-incision (1.8 mm) and after standard phacoemulsification through the small incision (2.75 mm). *Klinika Oczna*. 2014; 116: 7–10 PMID: [25137913](#)
20. Wilczynski M, Supady E, Loba P, Synder A, Palenga-Pydyn D, Omulecki W. Evaluation of surgically induced astigmatism after coaxial phacoemulsification through 1.8 mm microincision and standard phacoemulsification through 2.75 mm incision. *Klin Oczna*. 2011; 113:314–320 PMID: [22384647](#)
21. Berdahl JP, Jun B, DeStafeno JJ, Kim T. Comparison of a torsional handpiece through microincision versus standard clear corneal cataract wounds. *J Cataract Refract Surg*. 2008; 34: 2091–5. doi: [10.1016/j.jcrs.2008.08.025](#) PMID: [19027565](#)
22. Park YG, Chung SH, Joo CK. Comparison of microcoaxial with standard clear corneal incisions in torsional handpiece cataract surgery. *Ophthalmologica*. 2012; 227: 55–59. doi: [10.1159/000329599](#) PMID: [21832823](#)
23. Tam WY, Heng W. Surgically Induced Astigmatism: Coaxial Microincision Cataract Surgery vs. Small-Incision Cataract Surgery. *American Academy of Ophthalmology*. Available: <http://onlinelibrary.wiley.com/doi/10.1002/cochrane.clcentral/articles/882/CN-00745882/frame.html>.
24. Kim YK, Kim YW, Woo SJ, Park KH. Comparison of surgically-induced astigmatism after combined phacoemulsification and 23-gauge vitrectomy: 2.2-mm vs. 2.75-mm cataract surgery. *Korean J Ophthalmol*. 2014; 28: 130–137 doi: [10.3341/kjo.2014.28.2.130](#) PMID: [24688255](#)
25. Klamann MK, Gonnermann J, Maier AK, Torun N, Bertelmann E. Smaller incision size leads to higher predictability in microcoaxial cataract surgery. *Eur J Ophthalmol*. 2013; 23: 202–207 doi: [10.5301/ejo.5000207](#) PMID: [23112038](#)
26. Weikert MP, Wang L, Barrish J, Dimalanta R, Koch DD. Quantitative measurement of wound architecture in microincision cataract surgery. *J Cataract Refract Surg*. 2012; 38: 1460–1466 doi: [10.1016/j.jcrs.2012.03.036](#) PMID: [22814053](#)
27. Berdahl JP1, DeStafeno JJ, Kim T. Corneal wound architecture and integrity after phacoemulsification evaluation of coaxial, microincision coaxial, and microincision bimanual techniques. *J Cataract Refract Surg*. 2007; 33: 510–515. PMID: [17321403](#)
28. Cheng B, Liu Y, Liu Y, Xie BB, Xi L, Yang Y. Early changes in morphology and intraocular pressure by size of clear corneal incision. *Cornea*. 2011; 30: 634–640 doi: [10.1097/ICO.0b013e3181f7f149](#) PMID: [21282997](#)
29. Jun B, Berdahl JP, Kuo AN, Cummings TJ, Kim T. Corneal wound architecture and integrity after torsional and mixed phacoemulsification: evaluation of standard and microincisional coaxial techniques. *Ophthalmic Surg Lasers Imaging*. 2010; 41: 128–134 doi: [10.3928/15428877-20091230-23](#) PMID: [20128583](#)
30. Chang SW, Su TY, Chen YL. Influence of ocular features and incision width on surgically induced astigmatism after cataract surgery. *J Refract Surg*. 2015; 31: 82–88 doi: [10.3928/1081597X-20150122-02](#) PMID: [25735040](#)
31. Cui Wei; Liu Zhiying; Lu Qiang. Clinical comparative study of changes in the tear film and ocular surface after 1.8mm and 3.0 mm clear corneal incision phacoemulsification. *Chinese Journal of Practical Ophthalmology*. 2014. 32(12): 1424–1427

32. Denoyer A, Ricaud X, Van Went C, Labbé A, Baudouin C. Influence of corneal biomechanical properties on surgically induced astigmatism in cataract surgery. *J Cataract Refract Surg.* 2013; 39: 1204–1210 doi: [10.1016/j.jcrs.2013.02.052](https://doi.org/10.1016/j.jcrs.2013.02.052) PMID: [23756347](https://pubmed.ncbi.nlm.nih.gov/23756347/)
33. Capella MJ, Barraquer E. Comparative study of coaxial microincision cataract surgery and standard phacoemulsification. *Arch Soc Esp Ophthalmol.* 2010; 85: 268–73 doi: [10.1016/j.oftal.2010.09.004](https://doi.org/10.1016/j.oftal.2010.09.004) PMID: [21130942](https://pubmed.ncbi.nlm.nih.gov/21130942/)
34. Wylegała E, Rebkowska-Juraszek M, Dobrowolski D, Woyna-Orlewicz A. Influence of 3.0 mm incision coaxial phacoemulsification and microincision cataract surgery (MICS) on corneal thickness. *Klin Oczna.* 2009; 111: 207–211 PMID: [19899575](https://pubmed.ncbi.nlm.nih.gov/19899575/)
35. De Jin, Xin YJ, Yuan LD. Comparison of Clinical Results between 2.2 mm and 2.8 mm Incision Cataract Surgery Using Ellips Ultrasound. *Journal of The Korean Ophthalmological Society.* 2015; 56: 19–24
36. Brousseau FX, Dufay Dupar B, Laplace O, Adam R, Touzeau O, Rodallec T, Nordman JP. Comparative Study of Induced Corneal Astigmatism After 2.2 Mm and 3.3 Mm Incisions in Coaxial Phacoemulsification Cataract Surgery. *IOVS.* 2008; 1: 379
37. Torres RM, Manrique-de-Lara A, Guillen-Molina S, Correas P. Conventional Phaco versus Microincision Cataract Surgery (MICS). *IOVS.* 2006; 47: 636
38. Kocabora MS, Gocmez E, Taskapili M, Kocabora A, Cekic O. Surgical outcome of coaxial phacoemulsification with torsional ultrasound after a 2.4 mm versus 3.2 mm clear corneal temporal incision. *Bull Soc Belge Ophtalmol.* 2010; 315: 25–30. PMID: [21110507](https://pubmed.ncbi.nlm.nih.gov/21110507/)
39. Cleary Georgia; Spalton David J.; Hancox Joanne. Randomized intraindividual comparison of posterior capsule opacification between a microincision intraocular lens and a conventional intraocular lens. *Journal of Cataract and Refractive Surgery.* 2009; 35: 265–272
40. Hashemian SJ. Microcoaxial Phacoemulsification vs. Conventional Phacoemulsification. *American Academy of Ophthalmology*, 2007, Available: <http://onlinelibrary.wiley.com/doi/10.1007/s10384-014-0331-7>
41. Hwang Ho Sik, Ahn Ye Jin, Lee Hee Jin, Kim Man Soo, Kim Eun Chul. Comparison of macular thickness and inflammatory cytokine levels after microincision versus small incision coaxial cataract surgery. *Acta Ophthalmol.* 2015; doi: [10.1111/aos.12716](https://doi.org/10.1111/aos.12716)
42. Hayashi K, Yoshida M, Yoshimura K. Immediate changes in intraocular pressure after clear corneal micro-incision versus small-incision cataract surgery. *Jpn J Ophthalmol.* 2014; 58: 402–408 doi: [10.1007/s10384-014-0331-7](https://doi.org/10.1007/s10384-014-0331-7) PMID: [24969339](https://pubmed.ncbi.nlm.nih.gov/24969339/)
43. Masket Samuel, Wang Li, Belani Shaleen, Induced Astigmatism With 2.2- and 3.0-mm Coaxial Phacoemulsification Incisions. *J Refract Surg.* 2009; 25: 21–24 PMID: [19244949](https://pubmed.ncbi.nlm.nih.gov/19244949/)
44. Musanovic Z, Jusufovic V, Halibasic M, Zvornicanin J. Corneal astigmatism after micro-incision cataract operation. *Med Arh.* 2012; 66: 125–128. PMID: [22486146](https://pubmed.ncbi.nlm.nih.gov/22486146/)
45. Yao K, Wang W, Wu W, Tang XJ, Li ZC, Jin CF. Clinical evaluation on the coaxial 1.8 mm microincision cataract surgery. *Zhonghua Yan Ke Za Zhi.* 2011; 47: 903–907. PMID: [22321500](https://pubmed.ncbi.nlm.nih.gov/22321500/)
46. Kim EC, Byun YS, Kim MS. Microincision versus small-incision coaxial cataract surgery using different power modes for hard nuclear cataract. *J Cataract Refract Surg.* 2011; 37: 1799–1805 doi: [10.1016/j.jcrs.2011.04.024](https://doi.org/10.1016/j.jcrs.2011.04.024) PMID: [21839609](https://pubmed.ncbi.nlm.nih.gov/21839609/)
47. Li YJ, Kim HJ, Joo CK. Early changes in corneal edema following torsional phacoemulsification using anterior segment optical coherence tomography and Scheimpflug photography. *Jpn J Ophthalmol.* 2011; 55: 196–204 doi: [10.1007/s10384-011-0007-5](https://doi.org/10.1007/s10384-011-0007-5) PMID: [21559908](https://pubmed.ncbi.nlm.nih.gov/21559908/)
48. Wang J, Zhang EK, Fan WY, Ma JX, Zhao PF. The effect of micro-incision and small-incision coaxial phaco-emulsification on corneal astigmatism. *Clin Experiment Ophthalmol.* 2009; 37: 664–669. doi: [10.1111/j.1442-9071.2009.02117.x](https://doi.org/10.1111/j.1442-9071.2009.02117.x) PMID: [19788662](https://pubmed.ncbi.nlm.nih.gov/19788662/)
49. Hayashi Ken, Yoshida Motoaki, Hayashi Hideyuki, Postoperative corneal shape changes: Microincision versus small-incision coaxial cataract surgery. *J Cataract Refract Surg* 2009; 35: 233–239 doi: [10.1016/j.jcrs.2008.10.031](https://doi.org/10.1016/j.jcrs.2008.10.031) PMID: [19185236](https://pubmed.ncbi.nlm.nih.gov/19185236/)
50. Hayashi K, Yoshida M, Hayashi H. Corneal shape changes after 2.0-mm or 3.0-mm clear corneal versus scleral tunnel incision cataract surgery. *Ophthalmology.* 2010; 117:1313–1323 doi: [10.1016/j.ophtha.2009.11.041](https://doi.org/10.1016/j.ophtha.2009.11.041) PMID: [20363504](https://pubmed.ncbi.nlm.nih.gov/20363504/)
51. Hashemi Hassan; Zandvakil Narges; Rahimi Firoozeh. Clinical Comparison of Conventional Coaxial Phacoemulsification and Coaxial Microincision Phacoemulsification. *Iranian Journal of Ophthalmology.* 2010; 22: 13–24
52. Zhu Jian-Gang, Cao Ya, Xu Qi-Hua. Comparison of 2.2mm micro incision and 3.0mm incision coaxial phacoemulsification. *Int Eye Sci.* 2014; 14: 1433–1435

53. Lee KM, Kwon HG, Joo CK. Microcoaxial cataract surgery outcomes: comparison of 1.8 mm system and 2.2 mm system. *J Cataract Refract Surg.* 2009; 35: 874–880 doi: [10.1016/j.jcrs.2008.12.031](https://doi.org/10.1016/j.jcrs.2008.12.031) PMID: [19393887](https://pubmed.ncbi.nlm.nih.gov/19393887/)
54. Jiang Y, Le Q, Yang J, Lu Y. Changes in corneal astigmatism and high order aberrations after clear corneal tunnel phacoemulsification guided by corneal topography. *J Refract Surg.* 2006; 22: S1083–S1088 PMID: [17444098](https://pubmed.ncbi.nlm.nih.gov/17444098/)
55. Yao K, Tang X, Ye P. Corneal astigmatism, high order aberrations, and optical quality after cataract surgery: microincision versus small incision. *J Refract Surg.* 2006; 22: S1079–S1082 PMID: [17444097](https://pubmed.ncbi.nlm.nih.gov/17444097/)
56. Alió JL, Rodríguez-Prats JL, Galal A, Ramzy M. Outcomes of microincisional cataract surgery versus coaxial phacoemulsification. *Ophthalmology* 2005; 112:1997–2003 PMID: [16183129](https://pubmed.ncbi.nlm.nih.gov/16183129/)
57. Cavallini GM, Campi L, Masini C, Pelloni S, Pupino A. Bimanual microphacoemulsification versus coaxial miniphacoemulsification: prospective study. *J Cataract Refract Surg.* 2007; 33: 387–392 PMID: [17321387](https://pubmed.ncbi.nlm.nih.gov/17321387/)
58. Hayashi K, Hayashi H, Nakao F, Hayashi F. The correlation between incision size and corneal shape changes in sutureless cataract surgery. *Ophthalmology.* 1995; 102: 550–556. PMID: [7724172](https://pubmed.ncbi.nlm.nih.gov/7724172/)
59. Bourne WM, Nelson LR, Hodge DO. Continued endothelial cell loss ten years after lens implantation. *Ophthalmology.* 1994; 101: 1014–22 PMID: [8008341](https://pubmed.ncbi.nlm.nih.gov/8008341/)
60. Lundberg B, Jonsson M, Behndig A. Postoperative corneal swelling correlates strongly to corneal endothelial cell loss after phacoemulsification cataract surgery. *Am J Ophthalmol.* 2005; 139: 1035–1041. PMID: [15953433](https://pubmed.ncbi.nlm.nih.gov/15953433/)
61. Mencucci R, Ponchiotti C, Virgili G, Menchini U. Corneal endothelial damage after cataract surgery: microincision versus standard technique. *J Cataract Refract Surg.* 2006; 32: 1351–1354. PMID: [16863974](https://pubmed.ncbi.nlm.nih.gov/16863974/)
62. Dick HB, Kohnen T, Jacobi FK, Jacobi KW. Long-term endothelial cell loss following phacoemulsification through a temporal clear corneal incision. *J Cataract Refract Surg.* 1996; 22: 63–71. PMID: [8656366](https://pubmed.ncbi.nlm.nih.gov/8656366/)
63. Hayashi K, Hayashi H, Nakao F, Hayashi F. Risk factors for corneal endothelial injury during phacoemulsification. *J Cataract Refract Surg.* 1996; 22: 1079–1084. PMID: [8915805](https://pubmed.ncbi.nlm.nih.gov/8915805/)
64. Alió J, Rodríguez-Prats JL, Galal A, Ramzy M. Outcomes of microincision cataract surgery versus coaxial phacoemulsification. *Ophthalmology.* 2005; 112: 1997–2003. PMID: [16183129](https://pubmed.ncbi.nlm.nih.gov/16183129/)
65. Kahraman G, Amon M, Franz C, Prinz A, Abela-Formanek C. Intraindividual comparison of surgical trauma after bimanual microincision and conventional small-incision coaxial phacoemulsification. *J Cataract Refract Surg.* 2007; 33: 618–622 PMID: [17397733](https://pubmed.ncbi.nlm.nih.gov/17397733/)
66. Kreutzer Thomas C., Al Saeidi Rashid, Kampik Anselm, Grueterich Martin. Real-time intraocular pressure measurement in standard and microcoaxial phacoemulsification. *J Cataract Refract Surg.* 2010; 36: 53–57 doi: [10.1016/j.jcrs.2009.07.035](https://doi.org/10.1016/j.jcrs.2009.07.035) PMID: [20117705](https://pubmed.ncbi.nlm.nih.gov/20117705/)
67. Higa A, Sakai H, Sawaguchi S, et al. Corneal endothelial cell density and associated factors in a population-based study in Japan: the Kumejima study. *Am J Ophthalmol.* 2010; 149: 794–799 doi: [10.1016/j.ajo.2009.12.029](https://doi.org/10.1016/j.ajo.2009.12.029) PMID: [20231011](https://pubmed.ncbi.nlm.nih.gov/20231011/)
